# Supplementary material for: Integrated ESI-MS/EPR/computational characterization of the binding of metal species to proteins: vanadium drug–myoglobin application
Source: Royal Society of Chemistry journal article supplement (doi:10.1039/c9qi00179d), 2019-01-01
Supplement: c9qi00179d1.pdf [file c9qi00179d1.pdf]

## ELECTRONIC SUPPLEMENTARY INFORMATION (ESI)

### An Integrated ESI-MS/EPR/Computational Characterization of the Binding of Metal Species to Proteins: Vanadium Drugs–Myoglobin Application †

Giuseppe Sciortino,<sup>a,b</sup> Daniele Sanna,<sup>\*c</sup> Valeria Ugone,<sup>a</sup> Jean-Didier Maréchal,<sup>\*b</sup> and Eugenio Garribba,<sup>\*a</sup>

<sup>a</sup> *Dipartimento di Chimica e Farmacia, Università di Sassari, Via Vienna 2, I-07100 Sassari, Italy. E-mail: garribba@uniss.it; Tel: +39 079 229487.*

<sup>b</sup> *Departament de Química, Universitat Autònoma de Barcelona, 08193 Cerdanyola del Vallés, Barcelona, Spain. Jeandidier.Marechal@uab.cat; Tel: +34 935814936.*

<sup>c</sup> *Istituto CNR di Chimica Biomolecolare, Trav. La Crucca 3, I-07040 Sassari, Italy. E-mail: daniele.sanna@icb.cnr.it; Tel: +39 079 2841207.*

\* Corresponding authors.

**Table S1** Species identified in the ESI-MS spectra of the system V<sup>IV</sup>O<sup>2+</sup>/L-mimosinate.

| Ion                                         | Composition                                                      | Exptl m/z <sup>a</sup> | Calcd m/z <sup>a</sup> | Error (ppm) <sup>b</sup> |
|---------------------------------------------|------------------------------------------------------------------|------------------------|------------------------|--------------------------|
| [VO(mim) <sub>2</sub> +H] <sup>-</sup>      | C <sub>16</sub> H <sub>17</sub> N <sub>4</sub> O <sub>9</sub> V  | 460.04490              | 460.04407              | 1.8                      |
| [VO(mim) <sub>2</sub> ] <sup>2-</sup>       | C <sub>16</sub> H <sub>16</sub> N <sub>4</sub> O <sub>9</sub> V  | 229.51825              | 229.51839              | -0.6                     |
| [VO(mim) <sub>2</sub> (OH)+2H] <sup>-</sup> | C <sub>16</sub> H <sub>17</sub> N <sub>4</sub> O <sub>10</sub> V | 476.03973              | 476.03898              | 1.6                      |
| [VO(mim) <sub>2</sub> +2H] <sup>-</sup>     | C <sub>16</sub> H <sub>18</sub> N <sub>4</sub> O <sub>10</sub> V | 477.04744              | 477.04680              | 1.2                      |

<sup>a</sup> The experimental and calculated m/z values refer to the monoisotopic representative peak. <sup>b</sup> Deviation in ppm from the calculated values, calculated as  $10^6 \times [(\text{Exptl m/z} - \text{Calcd m/z})/\text{Calcd m/z}]$ .

**Table S2**  $^{51}\text{V}$  hyperfine coupling constants calculated at the level of theory BHandHLYP/6-311+g(d) for the possible bis-chelated  $\text{V}^{\text{IV}}\text{O}$  complexes formed by L-mimosinate.<sup>a</sup>

| Complex                            | $A_x^{\text{calcd}}$ | $A_y^{\text{calcd}}$ | $A_z^{\text{calcd}}$ | $A_z^{\text{exptl}}$ | PD <sup>b</sup> |
|------------------------------------|----------------------|----------------------|----------------------|----------------------|-----------------|
| <i>SPY-5-12</i>                    | -48.75               | -57.32               | -158.2               | -169.1               | -6.4            |
| <i>SPY-5-13</i>                    | -48.53               | -57.59               | -158.0               | -169.1               | -6.5            |
| <i>OC-6-32</i>                     | -59.17               | -63.54               | -163.8               | -169.1               | -3.1            |
| <i>OC-6-23</i>                     | -57.37               | -62.77               | -162.9               | -169.1               | -3.7            |
| <b><i>OC-6-34</i></b> <sup>c</sup> | -60.51               | -64.32               | -164.6               | -169.1               | -2.6            |
| <b><i>OC-6-24</i></b> <sup>c</sup> | -59.40               | -63.48               | -164.4               | -169.1               | -2.8            |

<sup>a</sup> All the  $A$  values are reported in  $10^{-4} \text{ cm}^{-1}$ . <sup>b</sup> Percent deviation (PD) with respect to the absolute experimental value calculated as:  $100 \times [(|A_z|^{\text{calcd}} - |A_z|^{\text{exptl}})/|A_z|^{\text{exptl}}]$ . <sup>c</sup> With boldface text the most probable isomers are shown.

**Table S3** Docking solutions for the interaction of VO(acac)<sup>+</sup> with myoglobin.

| Site            | Residues       | V-D <sup>a</sup> | <i>F</i> <sub>max</sub> <sup>b</sup> | <i>F</i> <sub>mean</sub> <sup>c</sup> | Pop. <sup>d</sup> |
|-----------------|----------------|------------------|--------------------------------------|---------------------------------------|-------------------|
| 1 <sup>st</sup> | His24; His119  | 2.108, 2.440     | 44.8                                 | 42.6                                  | 92%               |
| 2 <sup>nd</sup> | His82; Asp141  | 2.180, 2.452     | 34.5                                 | 30.7                                  | 64%               |
| 3 <sup>rd</sup> | Glu83; Asp141  | 2.181, 2.406     | 38.7                                 | 36.8                                  | 94%               |
| 4 <sup>th</sup> | His116; Gln124 | 2.683, 2.174     | 32.8                                 | 31.9                                  | 52%               |

<sup>a</sup> Distance in Å; D = N, O. <sup>b</sup> *Fitness* value for the most stable pose of each cluster (*F*<sub>max</sub>). <sup>c</sup> Mean *Fitness* value of the GoldScore scoring function for each cluster (*F*<sub>mean</sub>). <sup>d</sup> Percent population of the cluster.

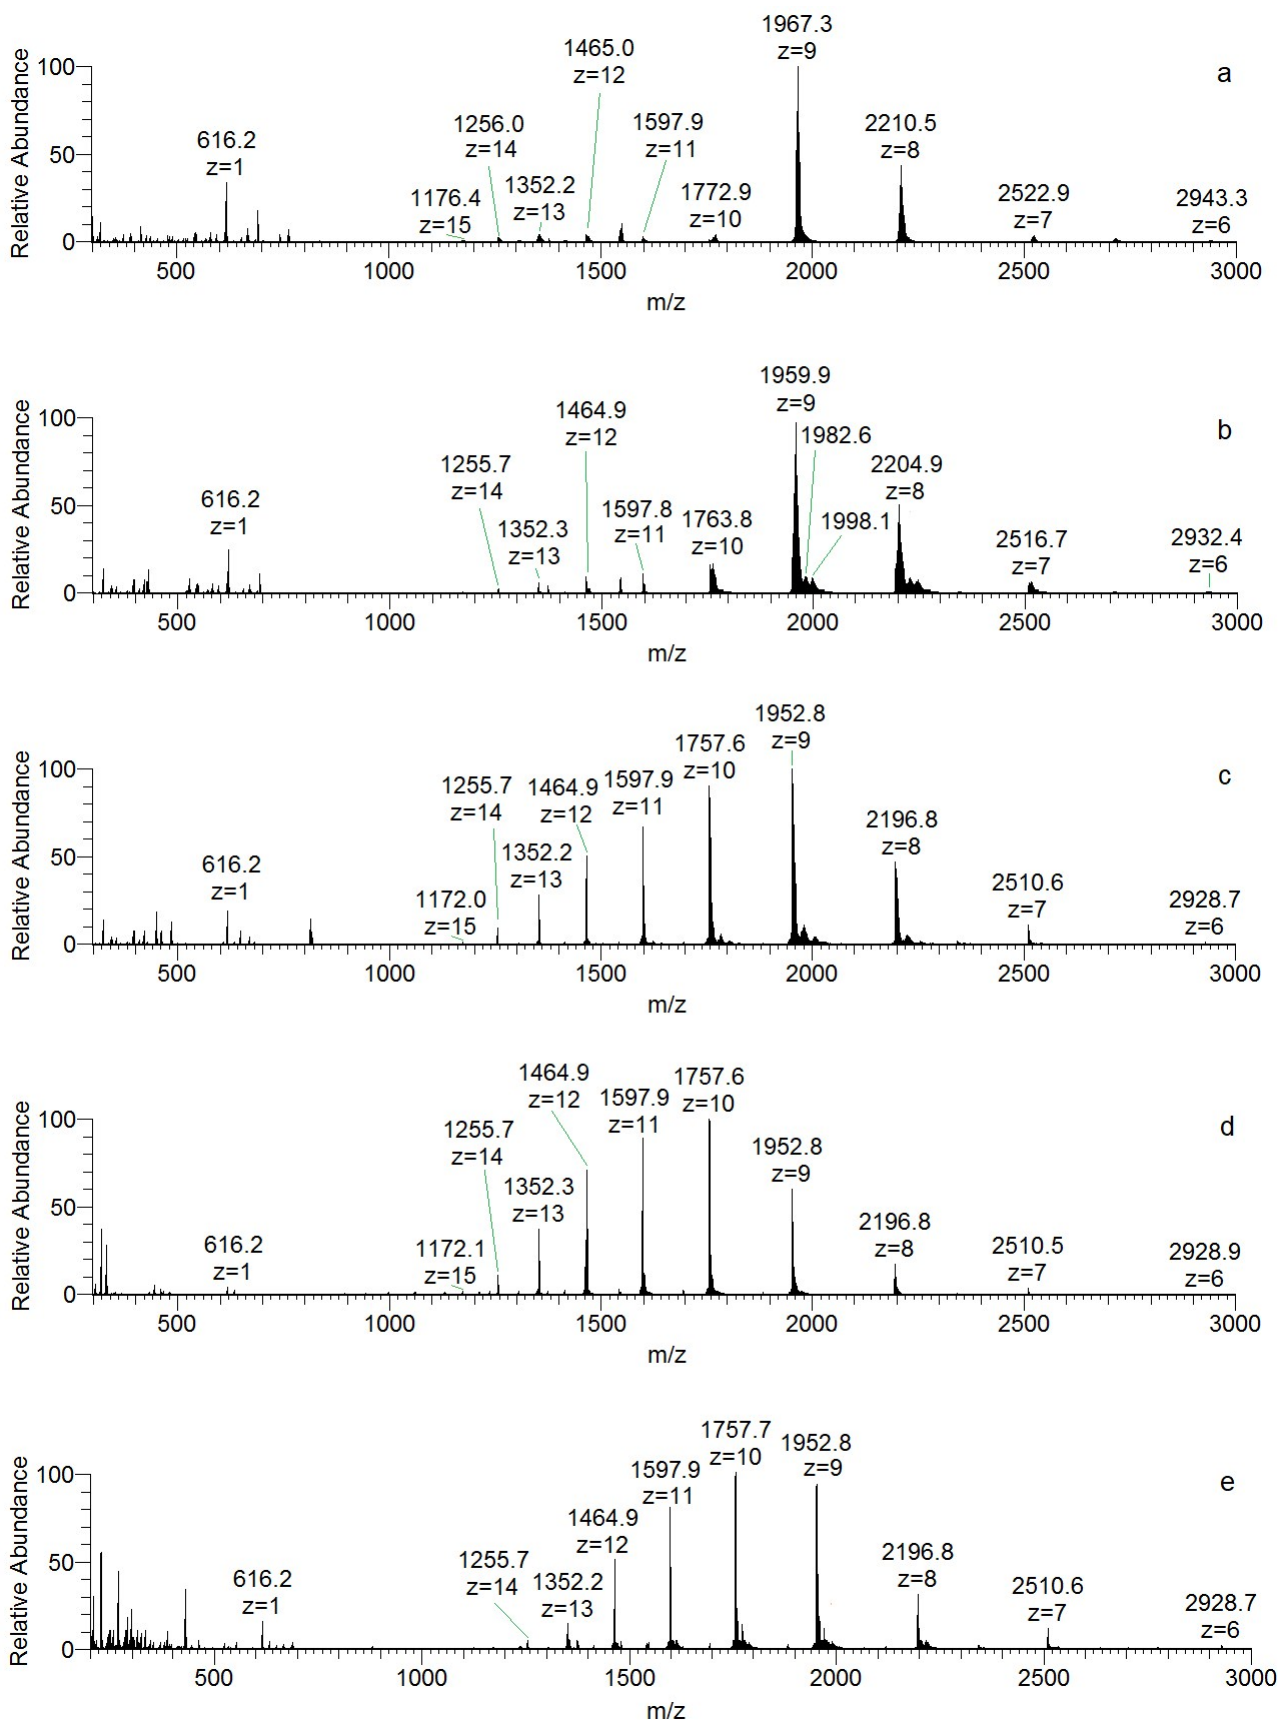

**Fig. S1** ESI-MS spectra recorded in the systems: (a) Mb; (b) [VO(dhp)<sub>2</sub>]/Mb; (c) *cis*-[VO(mim)<sub>2</sub>(H<sub>2</sub>O)]<sup>2-</sup>/Mb; (d) *cis*-[VO(ma)<sub>2</sub>(H<sub>2</sub>O)]/Mb; (e) [VO(acac)<sub>2</sub>]/Mb. Mb concentration was 5 μM and molar ratio V/Mb was 3/1.

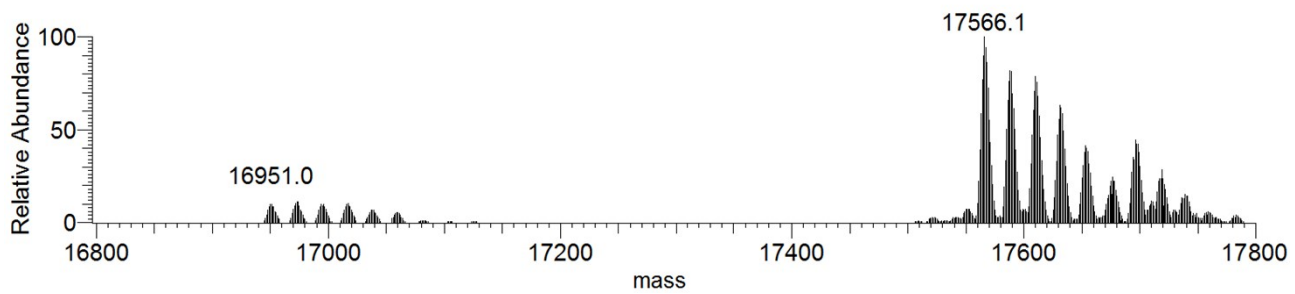

**Fig. S2** Deconvoluted ESI-MS spectrum of myoglobin (concentration 5  $\mu$ M). Mass is expressed in Da.

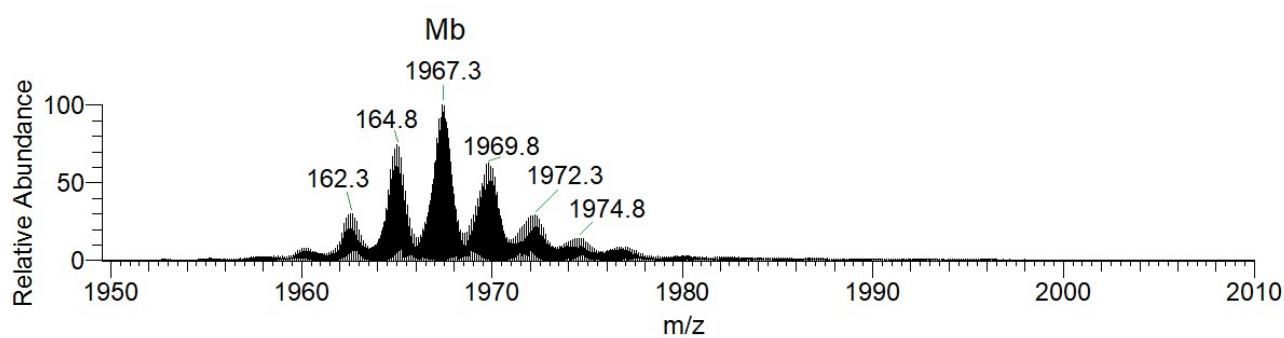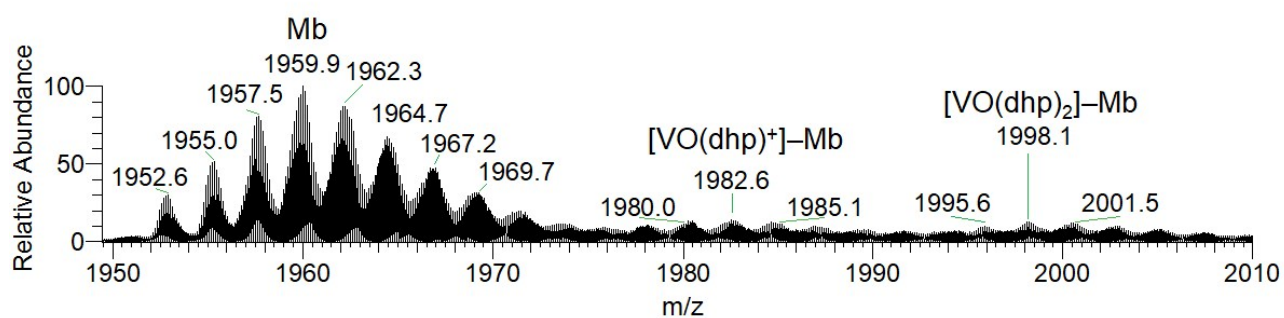

**Fig. S3** Zoom of the multiplex with charge +9 of (a) Mb and (b) system [VO(dhp)<sub>2</sub>]/Mb. Mb concentration was 5 μM and molar ratio V/Mb was 3/1. The most intense peak due to the adducts [VO(dhp)<sup>+</sup>]-Mb and [VO(dhp)<sub>2</sub>]-Mb are indicated.

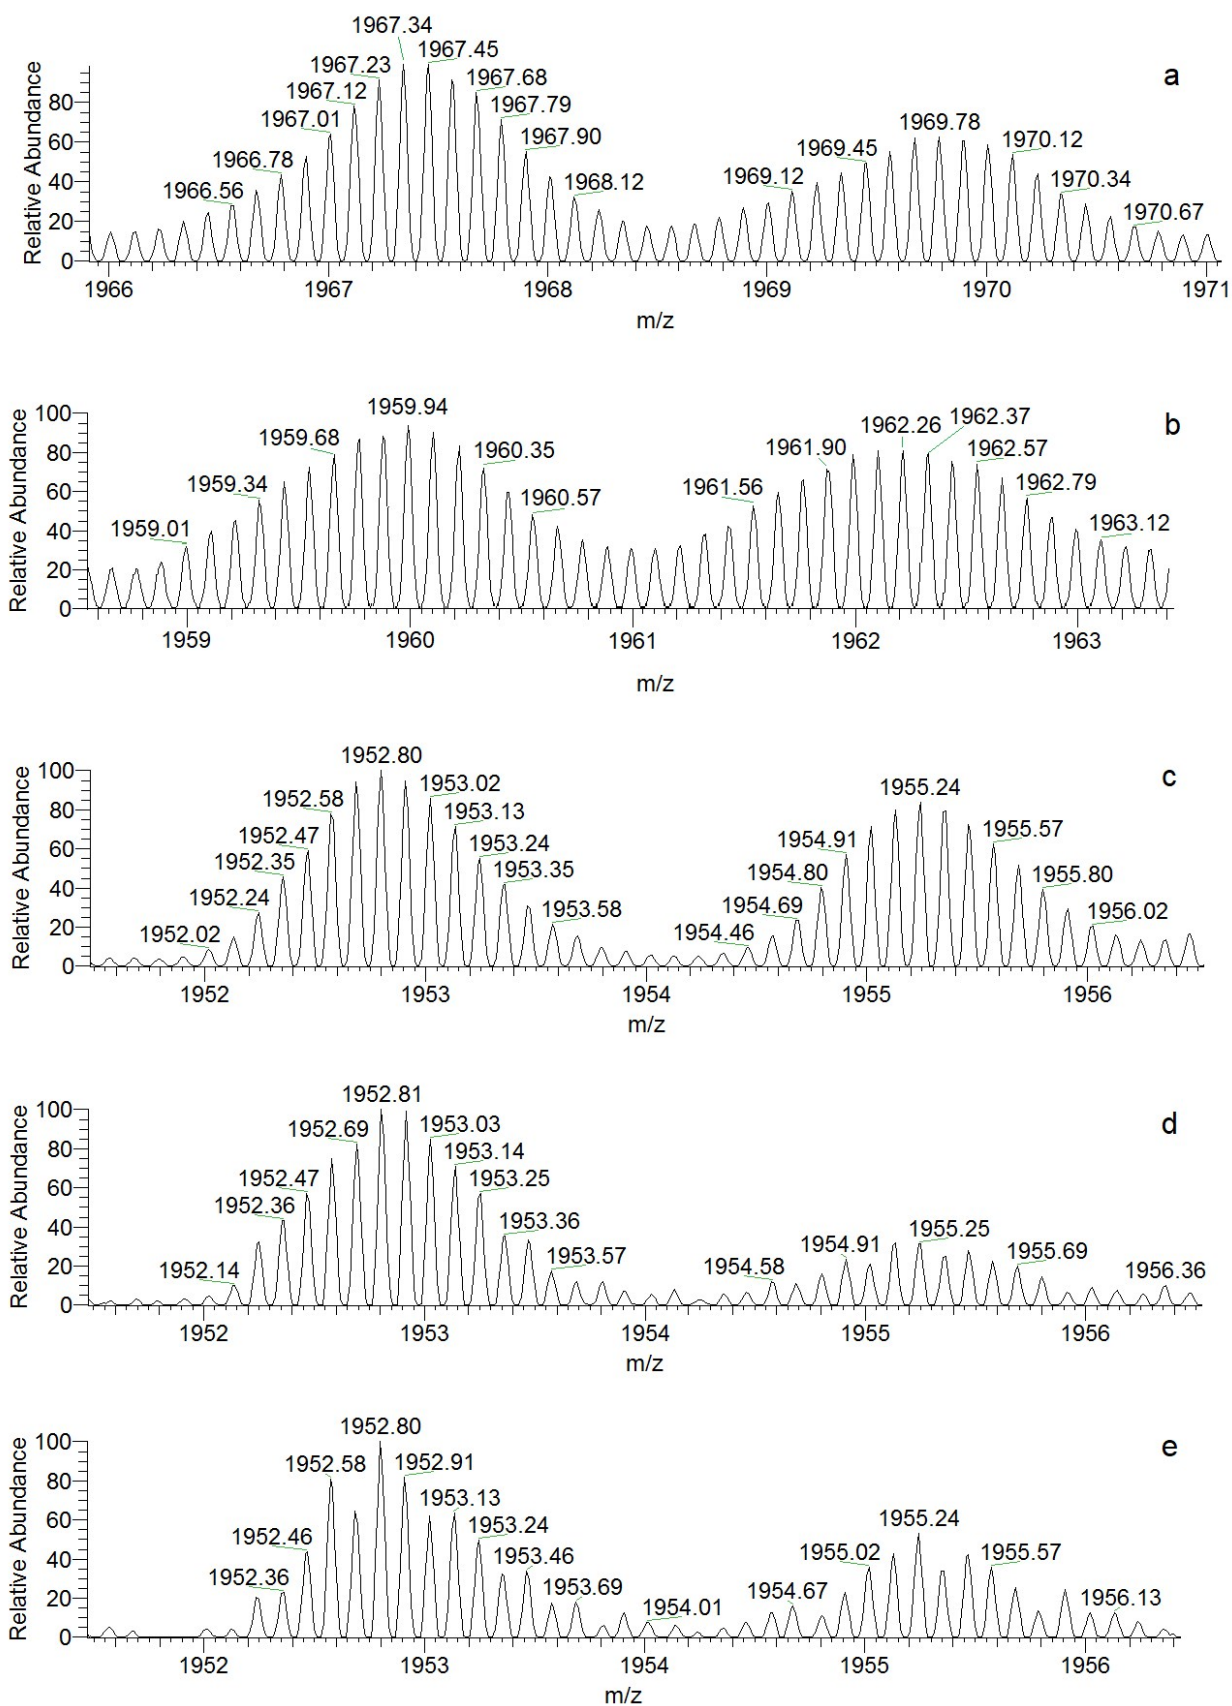

**Fig. S4** Ultrazoom of the two most intense peaks with charge +9 detected in the systems: (a) Mb; (b) [VO(dhp)<sub>2</sub>]/Mb; (c) *cis*-[VO(mim)<sub>2</sub>(H<sub>2</sub>O)]<sup>2+</sup>/Mb; (d) *cis*-[VO(ma)<sub>2</sub>(H<sub>2</sub>O)]/Mb; (e) [VO(acac)<sub>2</sub>]/Mb. Mb concentration was 5 μM and molar ratio V/Mb was 3/1.



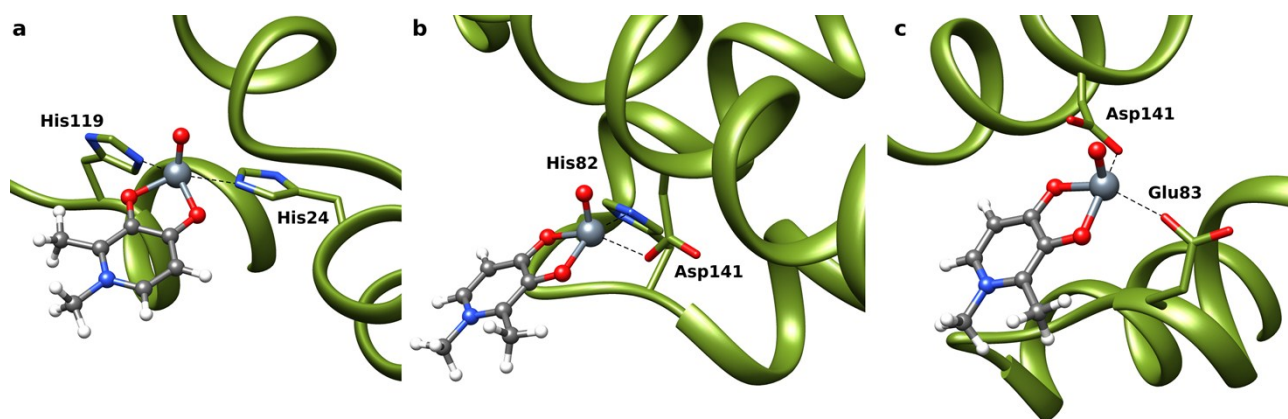

**Fig. S5** Most stable adducts predicted by docking methods for the interaction of the VO(dhp)<sup>+</sup> moiety with myoglobin: a) *SPY-5-13-A-VO(dhp)(H<sub>2</sub>O)<sub>2</sub>* with His24 and His119; b) *SPY-5-13-C-VO(dhp)(H<sub>2</sub>O)<sub>2</sub>* with His82 and Asp141 and c) *SPY-5-13-C-VO(dhp)(H<sub>2</sub>O)<sub>2</sub>* with Glu83 and Asp141.

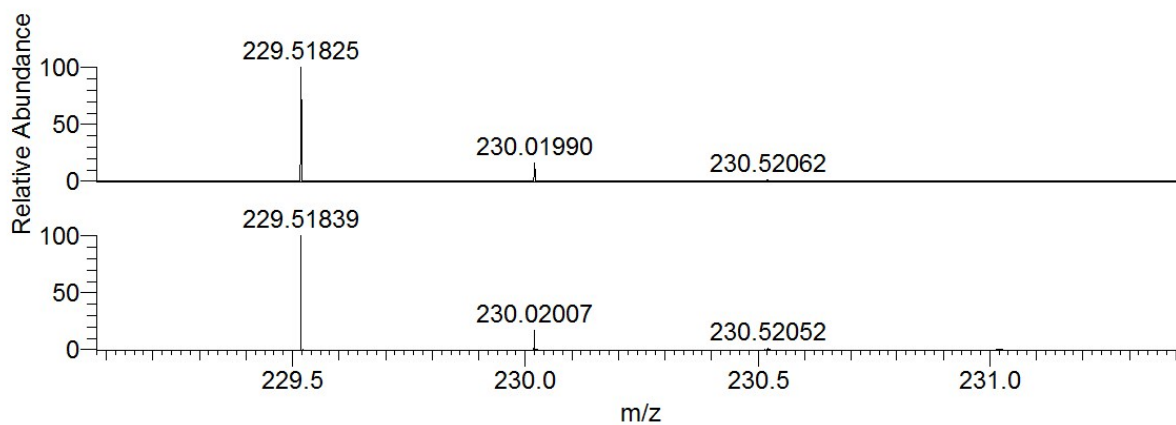

**Fig. S6** Experimental (above) and calculated (below) isotopic pattern for the peak of  $[\text{VO}(\text{mim})_2]^{2-}$  revealed at  $m/z = 229.5$  in the negative ESI-MS spectrum recorded on the system  $\text{V}^{\text{IV}}\text{O}^{2+}/\text{mim}$  1/2 (V concentration 50  $\mu\text{M}$ ).

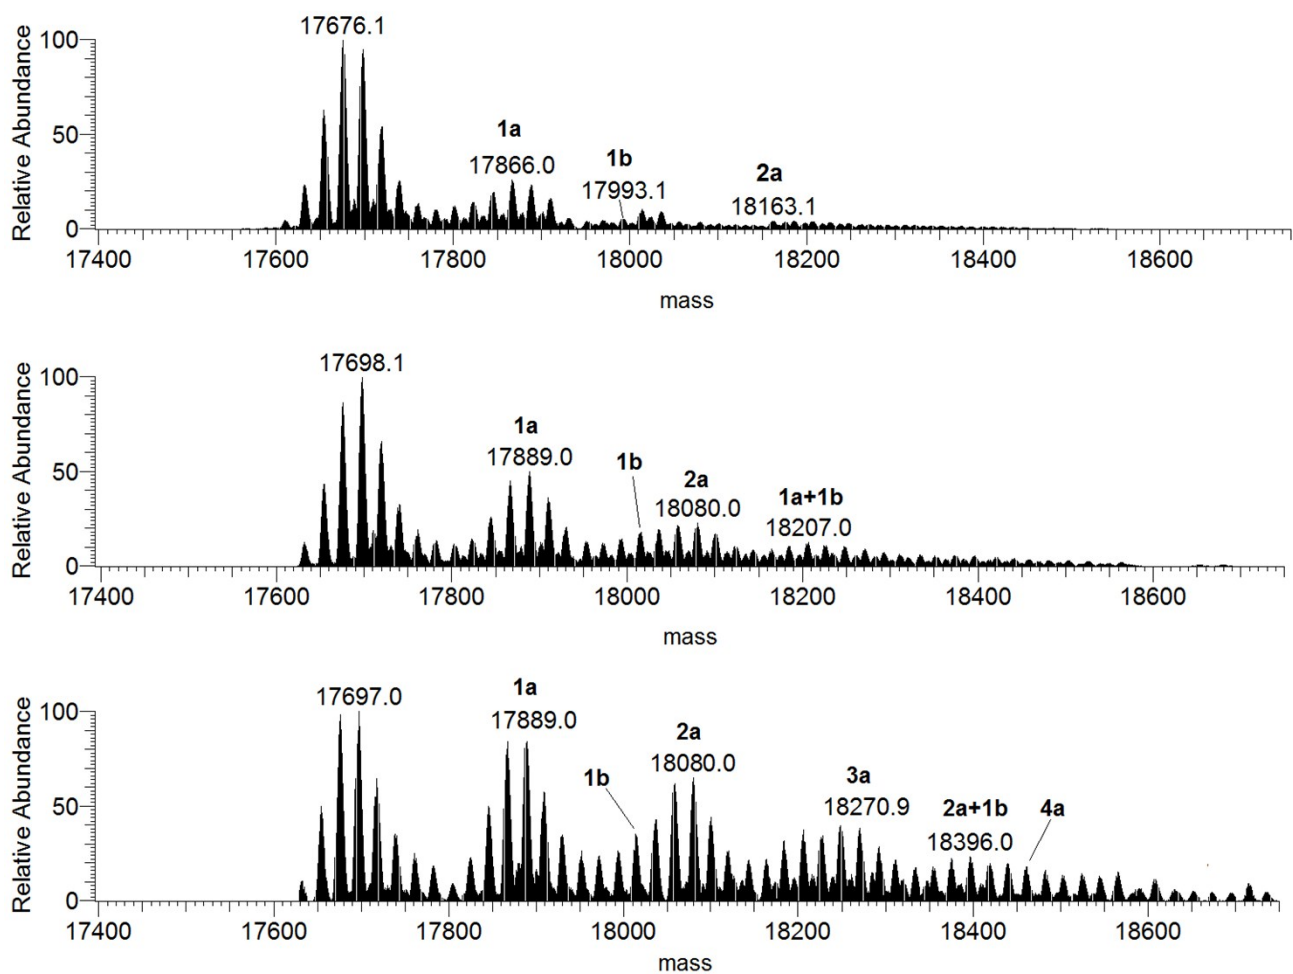

**Fig. S7** Deconvoluted ESI-MS spectra recorded on the system containing  $\text{VO}(\text{ma})_2$  and myoglobin (50  $\mu\text{M}$ ): molar ratio 3/1 (top), 5/1 (centre) and 10/1 (bottom). With **a** and **b** the fragments  $\text{VO}(\text{ma})^+$  and  $\text{VO}(\text{ma})_2$  are indicated. Mass is expressed in Da.

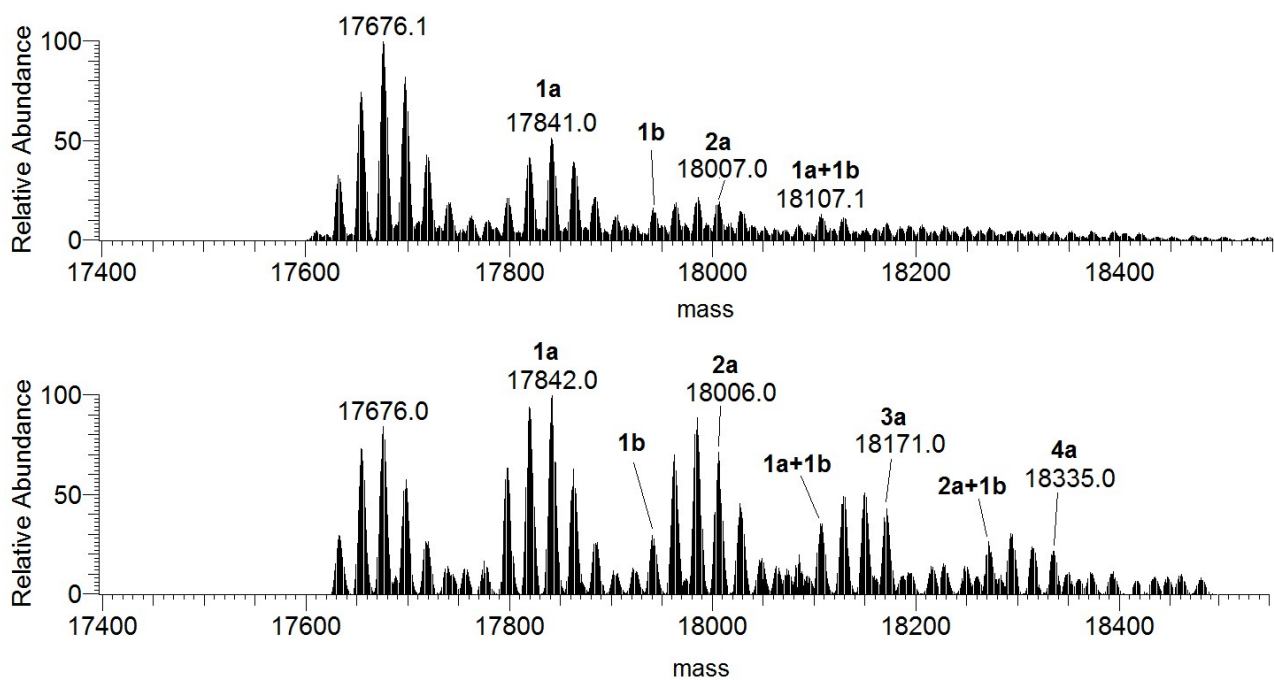

**Fig. S8** Deconvoluted ESI-MS spectra recorded on the system containing  $[\text{VO}(\text{acac})_2]$  and myoglobin ( $50 \mu\text{M}$ ): molar ratio 3/1 (top) and 5/1 (bottom). With **a** and **b** the fragments  $\text{VO}(\text{acac})^+$  and  $\text{VO}(\text{acac})_2$  are indicated. Mass is expressed in Da.

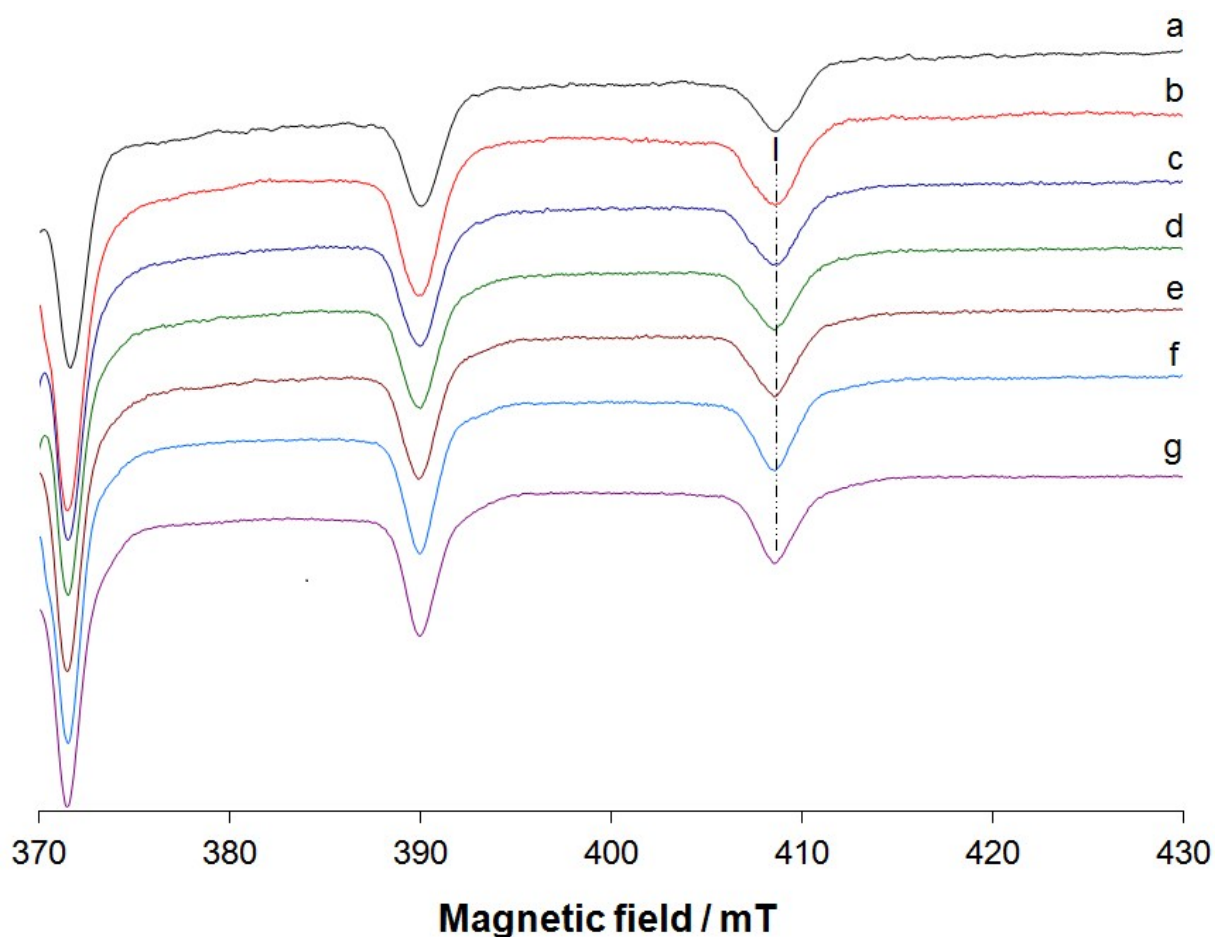

**Fig. S9** High field region of the X-band anisotropic EPR spectra recorded on frozen solutions (120 K) containing: a)  $V^{IV}O^{2+}/acac/MeIm$  1/2/4; b)  $V^{IV}O^{2+}/acac/Mb$  1/2/1; c)  $V^{IV}O^{2+}/acac/Mb$  2/4/1; d)  $V^{IV}O^{2+}/acac/Mb$  4/8/1; e)  $V^{IV}O^{2+}/acac/Mb$  6/12/1; f)  $V^{IV}O^{2+}/acac/Mb$  8/16/1; g)  $V^{IV}O^{2+}/acac/Mb$  10/20/1 and h)  $V^{IV}O^{2+}/acac$  1/2.  $V^{IV}O^{2+}$  concentration was  $1.0 \times 10^{-3}$  M. **I** and the dash-dotted lines indicate the  $M_1 = 7/2$  resonance of the species  $[VO(acac)_2]$ .

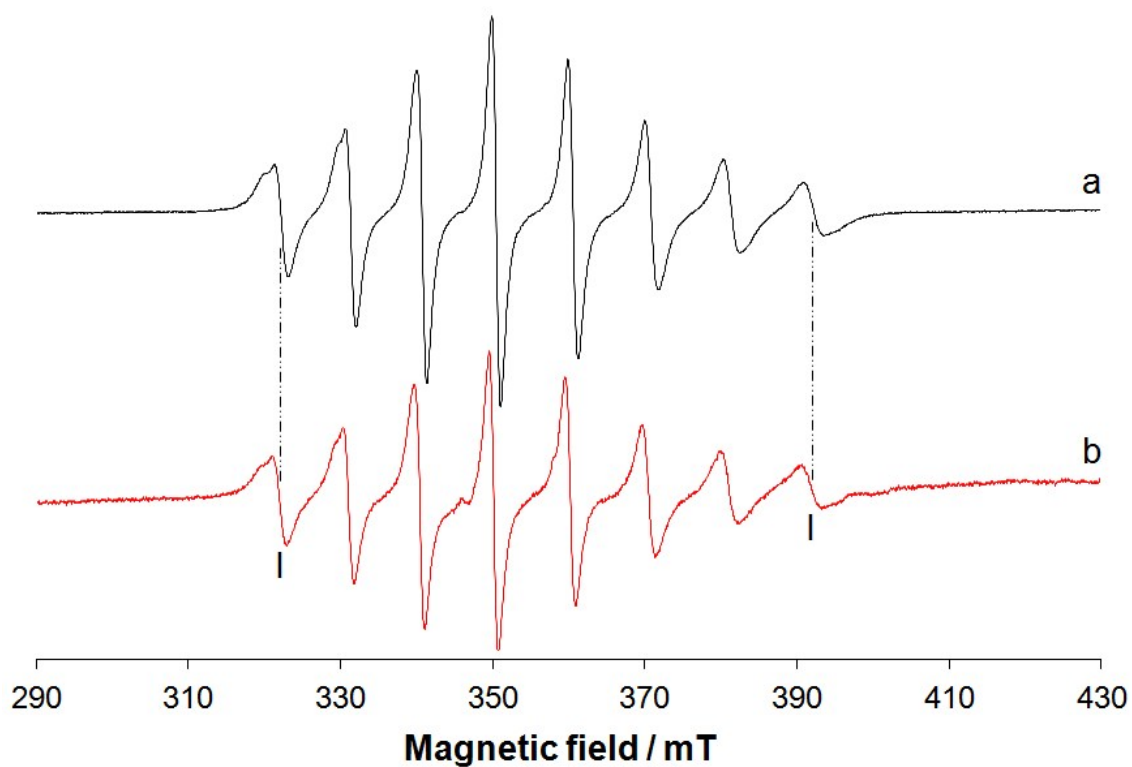

**Fig. S10** High field region of the X-band isotropic EPR spectra recorded on aqueous solutions (298 K) containing: a)  $V^{IV}O^{2+}/acac$  1/2 and b)  $V^{IV}O^{2+}/acac/Mb$  1/2/1.  $V^{IV}O^{2+}$  concentration was  $1.0 \times 10^{-3}$  M. **I** and the dash-dotted line indicate the  $M_1 = -7/2$  and  $7/2$  resonances of the species  $[VO(acac)_2]$ .

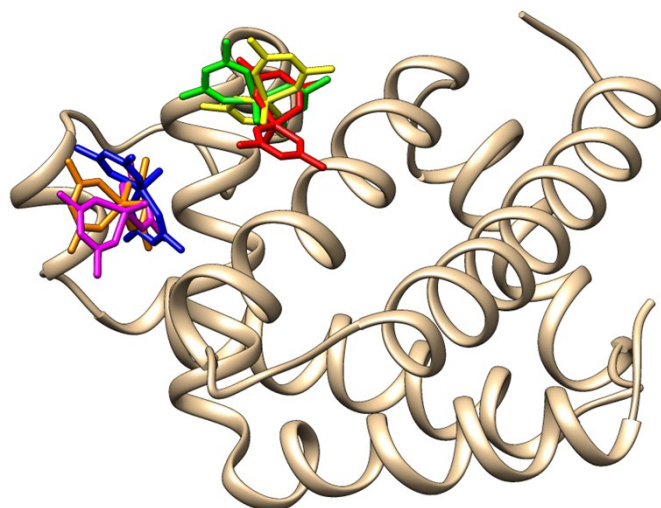

**Fig. S11** Cluster distribution for the interaction of  $[\text{VO}(\text{acac})_2]$  with myoglobin. The six clusters are represented with different colors.

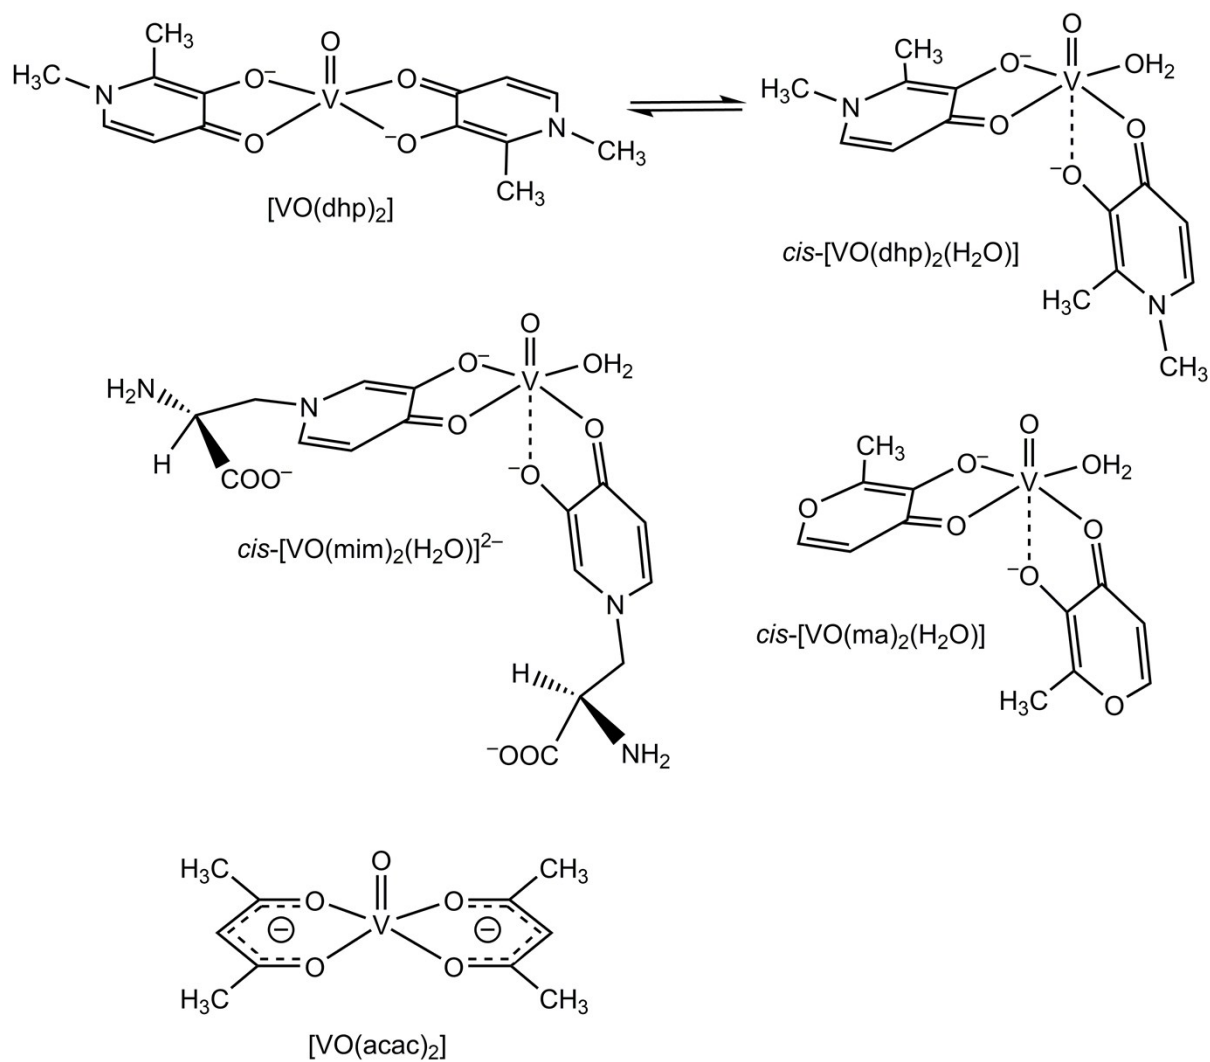

**Scheme S1** Structures in aqueous solution and physiological pH of the bis-chelated  $V^{IV}O$  complexes formed by 1,2-dimethyl-3-hydroxy-4(1*H*)-pyridinonate, L-mimosinate, maltolate and acetylacetonate.



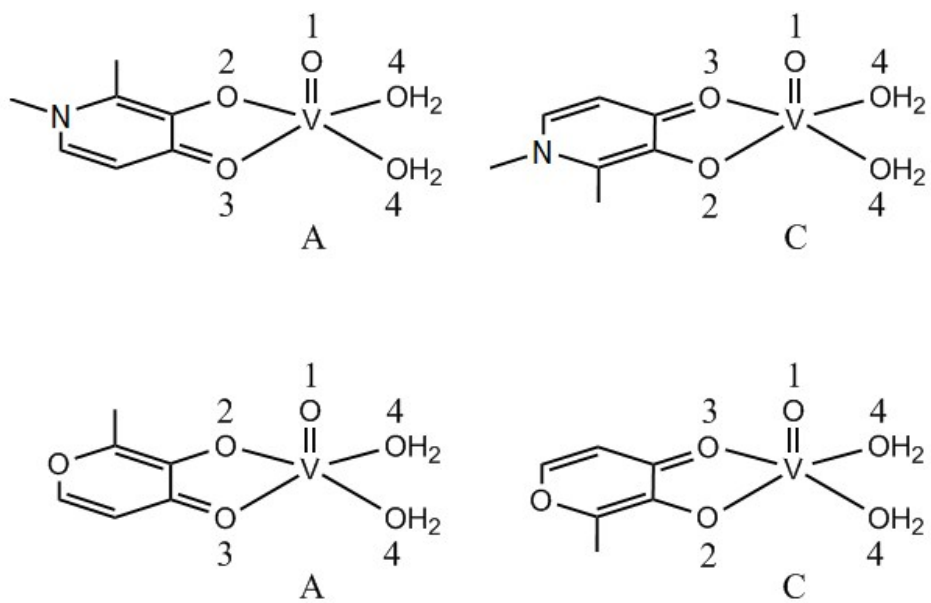

**Scheme S2** Enantiomers of  $[\text{VO}(\text{dhp})(\text{H}_2\text{O})_2]^+$  (above) and  $[\text{VO}(\text{ma})(\text{H}_2\text{O})_2]^+$  (below).

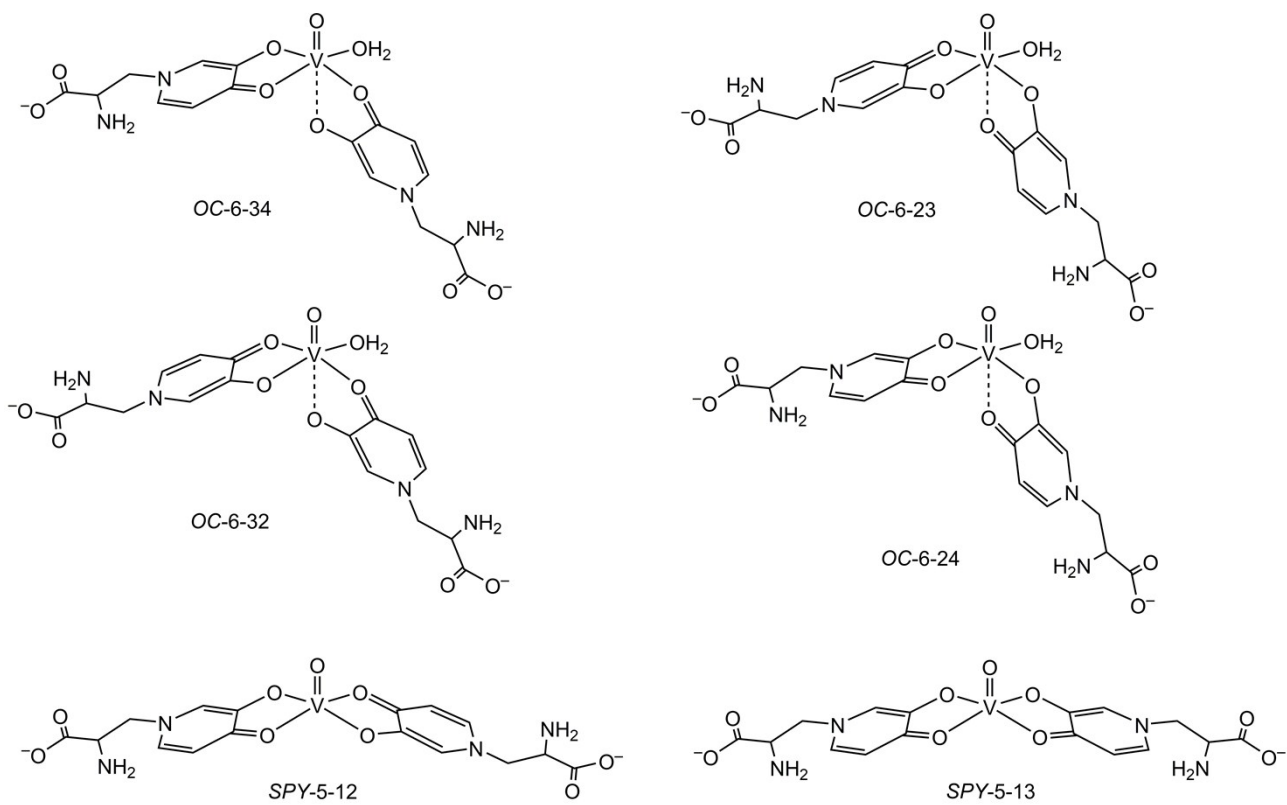

**Scheme S3** Possible isomers of the bis-chelated  $V^{IV}O$  complex formed by L-mimosinate.
